# RAR $\gamma$ is essential for retinoic acid induced chromatin remodeling and transcriptional activation in embryonic stem cells

Vasundhra Kashyap<sup>1,4,\*</sup>, Kristian B. Laursen<sup>1,\*</sup>, Fabienne Brenet<sup>2</sup>, Agnes J. Viale<sup>3</sup>, Joseph M. Scandura<sup>2</sup> and Lorraine J. Gudas<sup>1,2,4,†</sup>

<sup>1</sup>Department of Pharmacology, Weill Medical College of Cornell University, 1300 York Avenue, New York, NY 10065, USA

<sup>2</sup>Department of Medicine, Weill Medical College of Cornell University, 1300 York Avenue, New York, NY 10065, USA

<sup>3</sup>Genomics Core Laboratory, Memorial Sloan-Kettering Cancer Center, 1275 York Avenue, New York, NY 10021, USA

<sup>4</sup>Weill Graduate School of Biomedical Sciences, 1300 York Avenue, New York, NY 10065, USA

\*These authors contributed equally to this work

†Author for correspondence ([ljgudas@med.cornell.edu](mailto:ljgudas@med.cornell.edu))

Accepted 3 December 2012

*Journal of Cell Science* 126, 999–1008

© 2013. Published by The Company of Biologists Ltd

doi: 10.1242/jcs.119701

## Summary

We have utilized retinoic acid receptor  $\gamma$  (gamma) knockout (RAR $\gamma^{-/-}$ ) embryonic stem (ES) cells as a model system to analyze RAR $\gamma$  mediated transcriptional regulation of stem cell differentiation. Most of the transcripts regulated by all-trans retinoic acid (RA) in ES cells are dependent upon functional RAR $\gamma$  signaling. Notably, many of these RA–RAR $\gamma$  target genes are implicated in retinoid uptake and metabolism. For instance, *Lrat* (lecithin:retinol acyltransferase), *Stra6* (stimulated by retinoic acid 6), *Crabp2* (cellular retinoic acid binding protein 2), and *Cyp26a1* (cytochrome p450 26a1) transcripts are induced in wild type (WT), but not in RAR $\gamma^{-/-}$  cells. Transcripts for the transcription factors *Pbx1* (pre-B cell leukemia homeobox-1), *Wt1* (Wilm's tumor gene-1), and *Meis1* (myeloid ecotropic viral integration site-1) increase upon RA treatment of WT, but not RAR $\gamma^{-/-}$  cells. In contrast, *Stra8*, *Dleu7*, *Leftb*, *Pitx2*, and *Cdx1* mRNAs are induced by RA even in the absence of RAR $\gamma$ . Mapping of the epigenetic signature of *Meis1* revealed that RA induces a rapid increase in the H3K9/K14ac epigenetic mark at the proximal promoter and at two sites downstream of the transcription start site in WT, but not in RAR $\gamma^{-/-}$  cells. Thus, RA-associated increases in H3K9/K14ac epigenetic marks require RAR $\gamma$  and are associated with increased *Meis1* transcript levels, whereas H3K4me3 is present at the *Meis1* proximal promoter even in the absence of RAR $\gamma$ . In contrast, at the *Lrat* proximal promoter primarily the H3K4me3 mark, and not the H3K9/K14ac mark, increases in response to RA, independently of the presence of RAR $\gamma$ . Our data show major epigenetic changes associated with addition of the RAR $\gamma$  agonist RA in ES cells.

**Key words:** Meis1, Differentiation, Transcription, Nuclear receptor, Retinoic acid receptor, Epigenetics

## Introduction

Retinoic acid receptors (RARs) belong to the family of nuclear receptors that regulates transcription. There are three RAR isotypes (RAR $\alpha$ , RAR $\beta$ , RAR $\gamma$ ) that heterodimerize with RXRs (RXR $\alpha$ , RXR $\beta$ , RXR $\gamma$ ) and bind the cis-acting retinoic acid response elements (RAREs) to execute the biological functions of RA during embryonic development and postnatally (Clagett-Dame and Knutson, 2011; Means and Gudas, 1995; Samarut and Rochette-Egly, 2012). While single RAR mutant mice are viable and show relatively mild phenotypes, compound mutants of RARs display an array of congenital abnormalities and die shortly after birth (Mark et al., 2009).

RAR $\gamma$  null mice exhibit growth deficiency (Lohnes et al., 1993). Recently, RAR $\gamma$  was shown to be highly expressed in the growth plate, and ablation of RAR $\gamma$  is associated with reduced chondrocyte proliferation and decreased expression and deposition of proteoglycans (Williams et al., 2009). These findings provide some mechanistic understanding of the growth retardation phenotype observed in the RAR $\gamma$  null mice. RAR $\gamma$  regulates hindbrain and axial patterning, and its loss results in several malformations of the axial skeleton, including

anteriorization of the cervical and thoracic vertebrae (Lohnes et al., 1993; Wendling et al., 2001). RAR $\gamma$  is required for the formation of normal alveoli and alveoli elastic fibers in the lung (McGowan et al., 2000). Genetic ablation of RAR $\gamma$  results in male sterility and is associated with squamous metaplasia of seminal vesicles and the prostate glands and keratinization of glandular epithelia (Lohnes et al., 1993).

Retinoids also regulate hematopoietic development, which is dependent on distinct functions mediated by RAR $\alpha$  and RAR $\gamma$  (Purton, 2007). While RAR $\alpha$  induces granulocytic differentiation, RAR $\gamma$  plays a critical role in maintaining the balance between the self-renewal state of HSCs and their differentiation (Purton, 2007; Purton et al., 2006). Many of the molecular targets and pathways downstream of RAR $\gamma$  that mediate its effects on hematopoiesis remain to be determined.

RAR $\gamma$  mediates the anti-proliferative and apoptotic effects of retinoids in certain tissues and cancer cells, such as melanoma and neuroblastoma cells (Meister et al., 1998; Spanjaard et al., 1997). RAR $\gamma$  is the principal receptor that functions in RA mediated growth arrest in keratinocytes (Goyette et al., 2000). In a model of epidermal tumorigenesis, ablation of RAR $\gamma$  enhanced

the tumor incidence of Ras transformed keratinocytes and was associated with resistance to retinoid mediated growth arrest and apoptosis (Chen et al., 2004).

Studies conducted in our laboratory have shown that the lack of both alleles of RAR $\gamma$  in F9 teratocarcinoma stem cells is associated both with impaired differentiation and greatly reduced expression of genes involved in cell differentiation, such as Hoxa1, laminin B1, and collagen IV ( $\alpha$ 1) (Boylan et al., 1993; Boylan et al., 1995). A microarray analysis of F9 RAR $\gamma$  null teratocarcinoma stem cells revealed novel RAR $\gamma$  regulated genes, reinforcing its important role in retinoid signaling and differentiation (Su and Gudas, 2008a; Su and Gudas, 2008b).

We have now utilized murine RAR $\gamma$  knockout (RAR $\gamma$ <sup>-/-</sup>) embryonic stem (ES) cells as a model system to study RAR $\gamma$  mediated transcriptional regulation in development and cell differentiation. ES cells are derived from the inner cell mass of blastocysts and have the unique ability to self-renew under defined conditions (Smith, 2001). ES cells have a stable genome and possess the capacity to differentiate into the three germ layers, thus making them an excellent cell culture system to study RA mediated differentiation *in vitro* (Gudas and Wagner, 2011; Soprano et al., 2007). We previously reported that RAR $\gamma$  null ES cells do not differentiate into parietal endoderm, an epithelial cell type, in response to RA (Kashyap et al., 2011).

To delineate further the functions of RAR $\gamma$  in ES cells, we performed microarray analysis of wild type (WT) and RAR $\gamma$ <sup>-/-</sup> ES cells and identified differentially regulated genes. We characterized the transcriptional and epigenetic regulation of the RAR $\gamma$  target gene *Meis1* using chromatin immunoprecipitation (ChIP) and ChIP-chip technologies. Furthermore, functional depletion of RAR $\gamma$  in WT ES cells, combined with restored RAR $\gamma$  expression in RAR $\gamma$ <sup>-/-</sup> cells, confirmed the requirement for RAR $\gamma$  in the RA induced transcription of *Meis1*.

## Results

### Identification of differentially expressed genes in WT and RAR $\gamma$ knockout ES cells by microarray analysis

To identify RAR $\gamma$  regulated genes in ES cells, we performed microarray analyses of ES RAR $\gamma$  knockout (RAR $\gamma$ <sup>-/-</sup>) compared to wild type (WT) ES cells under different culture conditions. We cultured the WT and RAR $\gamma$ <sup>-/-</sup> cells with vehicle control or 1  $\mu$ M RA for 8 or 24 h. The 8 h and 24 h time points allowed us to examine the kinetics of RA induced transcript changes. The 8 h time point also provides the advantage of capturing early transcript changes that are less likely to be secondary changes related to cell differentiation.

A total of 152 transcripts were differentially regulated by threefold or more in untreated WT versus RAR $\gamma$ <sup>-/-</sup> ES cells (Fig. 1). Of these 152 differentially expressed transcripts, 80 transcripts showed reduced levels (Fig. 1; supplementary material Table S2A), and 78 transcripts showed elevated levels in the RAR $\gamma$ <sup>-/-</sup> cells compared to the WT cells in vehicle treated (untreated) conditions (Fig. 1; supplementary material Table S2B). These data suggest a role for RAR $\gamma$  in regulating gene expression in the absence of the ligand, as we demonstrated in teratocarcinoma stem cells for RAR $\alpha$  (Laursen et al., 2012). Furthermore, a total of 56 and 72 transcripts were differentially regulated by threefold or more in WT versus RAR $\gamma$ <sup>-/-</sup> ES cells upon 8 and 24 h of RA treatment, respectively (Fig. 1; supplementary material Table S3A,B, Table S4A,B).

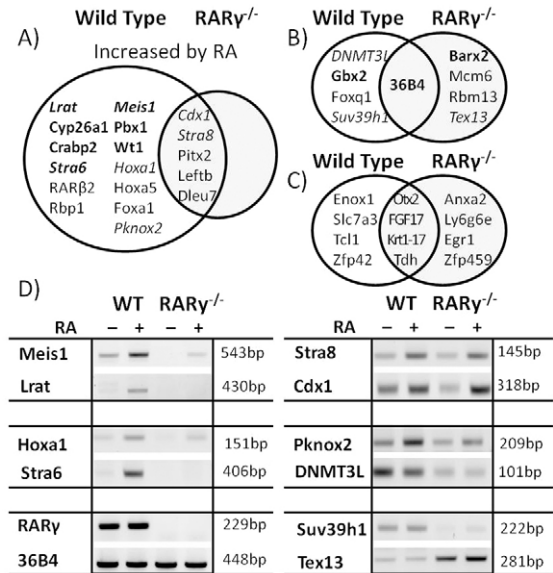

**Fig. 1. Microarray analysis of transcript levels in WT and RAR $\gamma$ <sup>-/-</sup> ES cells.** (A) Genes that show elevated transcript levels upon RA treatment for 24 h. The white circle shows genes induced by RA in WT ES cells; the gray circle shows genes induced by RA in RAR $\gamma$  null ES cells. The RAR $\gamma$ <sup>-/-</sup> ES cells were generated as described previously (Kashyap et al., 2011). The microarray data were generated from a single-cell cloned ES cell line. (B) Genes that are differentially expressed between untreated (vehicle only) WT and RAR $\gamma$ <sup>-/-</sup> cells at 24 h. The white circles show genes expressed at a higher level in untreated WT than RAR $\gamma$ <sup>-/-</sup> cells. The gray circles show genes expressed at a higher level in untreated RAR $\gamma$ <sup>-/-</sup> than in WT. (C) Genes that show decreased transcript levels upon RA treatment for 24 h. The white circle shows genes repressed by RA in WT cells. The gray circle shows genes repressed by RA in RAR $\gamma$ <sup>-/-</sup> cells. Genes validated by real time RT-PCR are shown in bold. Note that the Venn diagrams depict only a subset of the genes identified in each group (for complete lists, refer to the supplementary material Tables S2–S7). (D) Validation of transcript levels in WT and RAR $\gamma$ <sup>-/-</sup> ES cells by end-point PCR. *Meis1*, *Lrat*, *Hoxa1*, *Stra6*, and *Pknox2* display reduced RA dependent induction in RAR $\gamma$ <sup>-/-</sup> cells relative to WT, whereas *Stra8* and *Cdx1* are induced in the absence of RAR $\gamma$ . *DNMT3L*, *Suv39h1*, and *Tex13* are differentially expressed between WT and RAR $\gamma$ <sup>-/-</sup> ES cells in an RA independent manner. Experiments in D were performed multiple times with identical results; representative samples are shown.

### Transcripts are differentially regulated by RA in WT and RAR $\gamma$ knockout cells

To identify the genes that were regulated by RA treatment, we analyzed the fold changes in WT and RAR $\gamma$ <sup>-/-</sup> ES cells independently upon 8 and 24 h of RA treatment in comparison to the untreated controls for each cell line. A total of 29 and 91 transcripts were increased 2.5-fold in WT ES cells upon 8 and 24 h of RA treatment, respectively, compared to untreated WT (Fig. 1A; supplementary material Tables S5, S6). The 2.5-fold cut-off was selected based on advice from the Weill Cornell Bioinformatics Core staff. Transcript levels of many known RA target genes increased in WT ES cells in response to RA treatment, such as genes of the Hoxa and Hoxb clusters and *Cdx1*, *RAR $\beta$ 2*, and *Gata6* (Fig. 1A,D; supplementary material Table S5, Table S6A). Transcript levels of 40 genes decreased upon 24 h of RA treatment in WT cells (Fig. 1C; supplementary material Table S6B, Table S7B). In accord with previous studies, transcript levels of *Zfp42* (*Rex1*), a stem cell marker, were

reduced by 2.7-fold upon 24 h of RA treatment of WT cells (Fig. 1C; supplementary material Table S6B). Only a few genes (*Otx2*, *FGF17*, *Krt1-17*, and *Tdh*) showed reduced expression levels in both WT and *RAR $\gamma$ <sup>-/-</sup>* cells treated with RA for 24 h (Fig. 1C; supplementary material Table S6B, Table S7B).

In contrast, only 23 transcripts were increased by 2.5-fold or more in *RAR $\gamma$ <sup>-/-</sup>* ES cells upon treatment with RA for 24 h compared to untreated *RAR $\gamma$ <sup>-/-</sup>* (supplementary material Table S7A). The 8 h RA treatment did not induce significant (>2.5-fold) changes in the levels of any transcripts in the *RAR $\gamma$ <sup>-/-</sup>* ES cells compared to untreated *RAR $\gamma$ <sup>-/-</sup>* ES cells. A large number of transcripts that were differentially regulated by 2.5-fold or more in WT cells upon 24 h of RA treatment did not show statistically significant fold changes of 2.5-fold or more in the *RAR $\gamma$ <sup>-/-</sup>* ES cells (Fig. 1A; supplementary material Table S4A). Thus, *RAR $\gamma$*  is implicated in regulating this group of genes and our results also suggest that other RARs, i.e. *RAR $\alpha$*  and *RAR $\beta$* , incompletely compensate for the loss of *RAR $\gamma$* . However, *Stra6*, *Dleu7*, *Leftb*, *Pitx2*, and *Cdx1* were induced by RA by more than 3.8-fold even in the absence of *RAR $\gamma$* .

Gene ontology revealed that the vast majority of genes which exhibit reduced expression in *RAR $\gamma$ <sup>-/-</sup>* cells are homeobox genes involved in morphogenesis, axis formation, and tissue patterning (*Meis1*, *Pknox2*, *Pbx1*, *Foxq1*, *Gbx2*, and *Hox* genes). *RAR $\gamma$*  plays a key role in axis specification by RA (Bayha et al., 2009). The induction of *Hoxa1*, *Hoxa2*, *Hoxb1*, and *Hoxb2*, which are involved in rhombomere/hindbrain formation (Gavalas et al., 2003), is lost in *RAR $\gamma$ <sup>-/-</sup>* ES cells. Reduced levels of *Anxa5*, *Anxa2*, *F2r*, *F2r11*, and *Gap43* suggest impaired wound healing in *RAR $\gamma$ <sup>-/-</sup>* mice. Also, the transcript levels of several P450 cytochromes (*Cyp1b1*, *Cyp26a1*, and *Cyp7b1*) are reduced in *RAR $\gamma$ <sup>-/-</sup>* cells, pointing to abnormal metabolism. Finally, reduced expression of *Col4a1*, *Col4a2*, *Ccnd2*, *Lama1*, *Pik3r1*, *PDGFR $\alpha$* , and *Zyxin* in *RAR $\gamma$ <sup>-/-</sup>* versus WT suggests that focal adhesion may be impaired in *RAR $\gamma$ <sup>-/-</sup>* ES cells, which could lead to increased cellular mobility and/or invasiveness.

### ***RAR $\gamma$* regulates RA mediated changes in the transcript levels of genes involved in retinoid metabolism, including *Stra6*, *Cyp26a1*, *Lrat* and *Crabp2*, in ES cells**

Because we previously observed alterations in the expression of several genes involved in retinol metabolism during ES differentiation (Langton and Gudas, 2008), we assessed the mRNA levels of several genes that function in the retinoid metabolism pathway by real time RT-PCR to determine if they were regulated by *RAR $\gamma$* . RA greatly increased transcript levels of *Stra6*, *Lrat*, *Crabp2*, and *Cyp26a1* in WT cells but not in the *RAR $\gamma$ <sup>-/-</sup>* cells, implicating *RAR $\gamma$*  in the regulation of retinoid metabolism (Fig. 2). *Stra6* is a membrane bound receptor that binds to the serum retinol binding protein (RBP4), a carrier of retinol in the blood, and *Stra6* both facilitates uptake of retinol and cell signaling via *STAT5* (Berry et al., 2011; Kawaguchi et al., 2007). Mutations in *Stra6* cause a wide range of defects that include anophthalmia, pulmonary agenesis, diaphragmatic hernia, pancreatic malformations, mental retardation, and congenital heart defects (Golzio et al., 2007; Pasutto et al., 2007). *Lrat* is an enzyme that converts intracellular retinol to retinyl esters; such esters are a storage form of retinoids in the cell (Amengual et al., 2012; Batten et al., 2004; Guo and Gudas, 1998; Liu and Gudas, 2005; O'Byrne et al., 2005; Zolfaghari and Ross, 2000). *Crabp2* is involved in transporting RA from the

cytoplasm into the nucleus (Noy, 2000), and *Cyp26a1* metabolizes RA into polar metabolites in ES cells (Langton and Gudas, 2008; White et al., 1997). Real time PCR validation showed that the kinetics of the RA mediated increases in transcript levels of *Stra6*, *Crabp2*, and *Cyp26a1* are similar (Fig. 2B–D). All three transcripts increase as early as 8 h after RA addition and show increased expression at 48 h of RA treatment in WT ES cells (Fig. 2A–E). In contrast, *Stra6*, *Crabp2*, and *Cyp26a1* transcripts remained much lower in the *RAR $\gamma$ <sup>-/-</sup>* cells (Fig. 2A–E). *Lrat* mRNA levels in WT ES cells increased as early as 8 h after RA addition and reached a maximum at 24 h of RA treatment, after which *Lrat* mRNA levels declined (Fig. 2A, black square). *Lrat* transcript levels did not increase in the *RAR $\gamma$ <sup>-/-</sup>* cells treated with RA (Fig. 2A, open triangle). The mRNA levels of the reference gene *36B4* (*Rplp0*) were measured as an internal control and were unchanged with RA treatment (Fig. 2E).

### **The *Lrat* gene is epigenetically altered by RA treatment**

Transcriptional induction by RA is frequently associated with increased levels of transcriptional permissive marks, such as H3K9/14ac and H3K4me3, whereas the levels of transcriptional repressive marks, such as the polycomb (PcG) deposited H3K27me3, are decreased (Gillespie and Gudas, 2007b; Kashyap and Gudas, 2010; Wu et al., 2009). RA treatment for 24 h causes a ~10-fold increase in the *Lrat* transcript level in WT ES cells (Fig. 2A), yet the levels of H3K9/14ac marks did not significantly increase in response to RA (Fig. 2F). The levels of the epigenetic mark H3K4me3 were similar in WT and *RAR $\gamma$ <sup>-/-</sup>* ES cells (Fig. 2F). We also found that the *Lrat* gene is associated with a repressive H3K27me3 mark in untreated WT and *RAR $\gamma$ <sup>-/-</sup>* ES cells. While RA treatment leads to a reduction in the H3K27me3 mark in the WT ES cells, H3K27me3 levels remain high in the *RAR $\gamma$ <sup>-/-</sup>* ES cells and in fact, the levels of H3K27me3 at 24 h of RA treatment are higher than those in untreated *RAR $\gamma$ <sup>-/-</sup>* cells (Fig. 2A). Thus, our data indicate a role for RA and *RAR $\gamma$*  in the transcriptional activation of *Lrat* by antagonizing PcG mediated repression. We also show that *RAR $\gamma$*  is not required for the placement of H3K4me3, an epigenetic mark generally associated with transcriptionally active chromatin (Sims and Reinberg, 2006), and that the presence of this mark is not sufficient for active transcription of *Lrat* in RA treated *RAR $\gamma$ <sup>-/-</sup>* cells.

### ***RAR $\gamma$* regulates transcript levels of transcription factors**

We further validated the transcript levels of several transcription factors that play key roles in different aspects of differentiation during development and are differentially expressed in the WT and *RAR $\gamma$ <sup>-/-</sup>* cells (Fig. 3A–E). *Meis1* and *Pbx1* are homeodomain transcription factors that function as cofactors of *Hox* proteins and regulate distinct aspects of differentiation (Chang et al., 1996; Featherstone, 2003; Shanmugam et al., 1999; Shen et al., 1996; Shen et al., 1997; Soprano et al., 2007). Dysregulated expression of these cofactors in combination with *Hox* proteins is observed in different types of leukemia (Eklund, 2007; Wang et al., 2006). *Pbx1* is required during embryogenesis for skeletal patterning, development of adrenal glands and pancreas, urogenital differentiation, nephrogenesis, and maintenance of hematopoiesis in the liver of the developing fetus (Moens and Selleri, 2006). *Meis1* disruption in mice is embryonic lethal and *Meis1* deficient embryos have defects in the eye, angiogenesis, and hematopoiesis (Azcoitia et al., 2005; Hisa



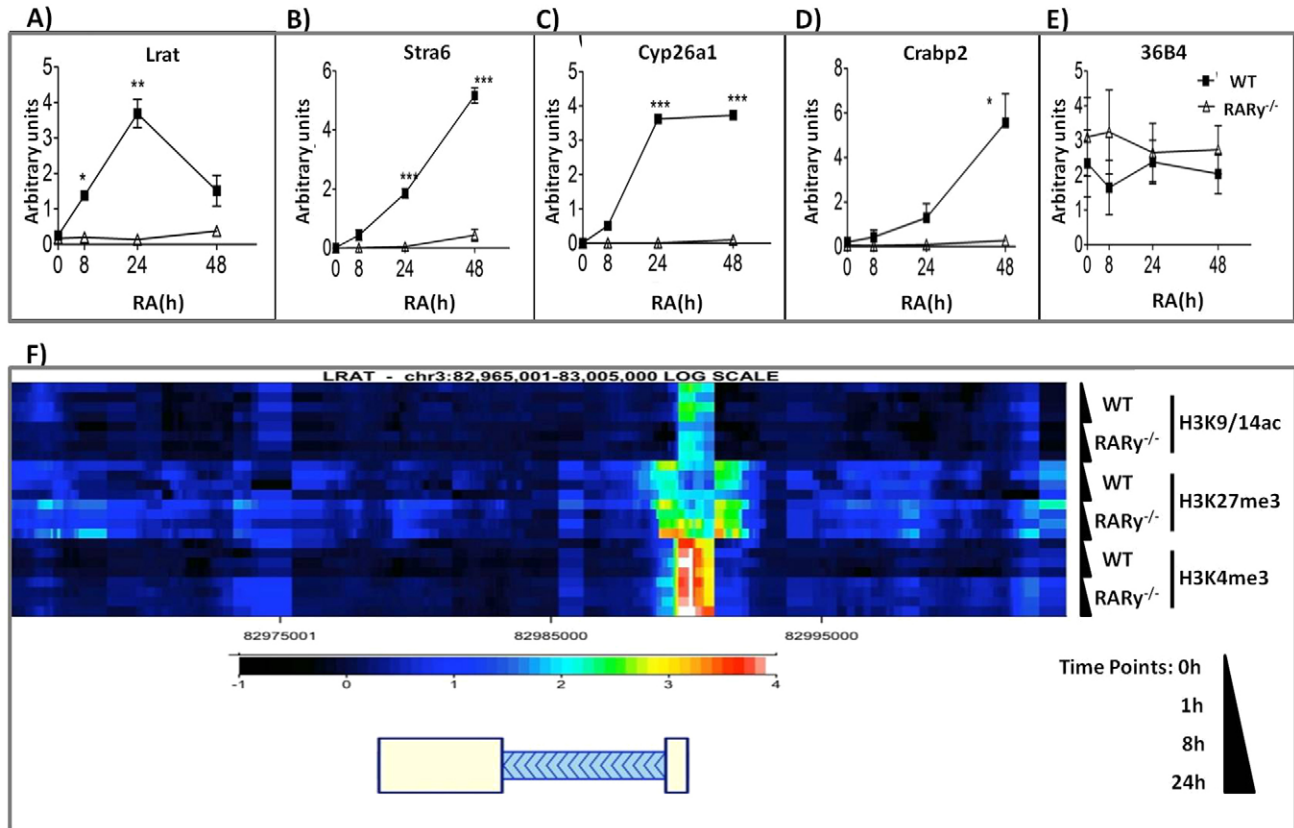

**Fig. 2. RA regulated induction of retinoid metabolism genes.** (A–E) Transcript levels of *Lrat*, *Stra6*, *Cyp26a1*, *Crabp2*, and *36B4* (a control) in WT and *RAR $\gamma^{-/-}$*  ES cells. Experiments were performed three times using independent RNA samples (■ WT; △ *RAR $\gamma^{-/-}$* ); the error bars represent the standard error of the mean (s.e.m.). (F) ChIP-chip heatmap of the *Lrat* genomic region showing H3K9/14ac, H3K27me3, and H3K4me3 histone marks in WT and *RAR $\gamma^{-/-}$*  cells upon increasing times of exposure to RA (0, 1, 8, and 24 h, black triangle). The colors represent log<sub>2</sub>-transformed ChIP enrichment in ChIP-chip data sets (replicate means). Columns show genomic loci and rows show IP condition. Statistical significance: \* $P < 0.05$ , \*\* $P < 0.01$ , \*\*\* $P < 0.005$ . The color scale of the log<sub>2</sub> enrichment is indicated below the ChIP-chip data panel. The *Lrat* genomic location (blue tones) is indicated schematically at the bottom.

et al., 2004). Expression of *Meis1* is elevated in acute myeloid leukemias, and *Meis1* has oncogenic potential in leukemias that harbor fusion proteins with the translocation of MLL (mixed lineage leukemia) family members (Kawagoe et al., 1999; Wong et al., 2007). *Pbx1* and *Meis1* mRNA levels increase upon 24 h of RA treatment in WT cells, and transcript levels continue to increase up to 48 h of RA treatment (Fig. 3A,B). In contrast, RA did not increase *Pbx1* and *Meis1* transcript levels in the *RAR $\gamma^{-/-}$*  cells (Fig. 3A,B).

*Wt1* (Wilm's tumor gene) encodes a transcription factor that has an essential role in the normal development of the urogenital system, and is mutated in a subset of patients with Wilm's tumors, a type of kidney tumor (Kreidberg et al., 1993; Pelletier et al., 1991a; Pelletier et al., 1991b). RA increased *Wt1* mRNA levels at 48 h in WT cells, but no RA dependent increase in the *Wt1* mRNA levels occurred in the *RAR $\gamma^{-/-}$*  cells (Fig. 3C).

*Gbx2* (gastrulation brain homeobox 2) is required for normal development of mid/hindbrain region and morphogenesis of the inner ear (Lin et al., 2005; Wassarman et al., 1997). In WT cells RA treatment caused less than a twofold increase in the *Gbx2* mRNA levels. *Gbx2* mRNA levels were consistently lower in *RAR $\gamma^{-/-}$*  cells compared to WT cells (Fig. 3D).

*Barx1* is a homeodomain transcription factor that is expressed in the stomach mesenchyme and molar dental cells of mesenchymal origin (Makarenkova and Meech, 2012). *Barx1* mRNA levels were 70-fold lower in untreated WT cells than in the untreated *RAR $\gamma^{-/-}$*  cells (Fig. 3E). At 48 h of RA treatment *Barx1* mRNA levels decreased by ~25% in the *RAR $\gamma^{-/-}$*  cells, whereas *Barx1* transcript levels did not change in WT cells (Fig. 3E). Thus, RA mediates changes in the transcript levels of multiple genes involved in differentiation and development that require *RAR $\gamma$* . Why these specific genes are highly regulated by RA in differentiating WT ES cells is not yet clear.

#### RA induces *RAR $\gamma$* dependent epigenomic re-organization of the *Meis1* gene in WT cells

Since aberrant regulation of *Meis1* is implicated in leukemia (Kawagoe et al., 1999; Wong et al., 2007) and we are interested in differentiation therapy for cancer, we next examined the dynamics of the RA induced increase in *Meis1* transcript levels in further detail. We hypothesized that RA signaling would induce epigenetic changes at the *Meis1* gene and that loss of *RAR $\gamma$*  would prevent such chromatin changes at this gene. In WT cells RA induced a rapid increase in H3K9/14ac levels at the proximal promoter and at specific regions (DS1 and DS2) located

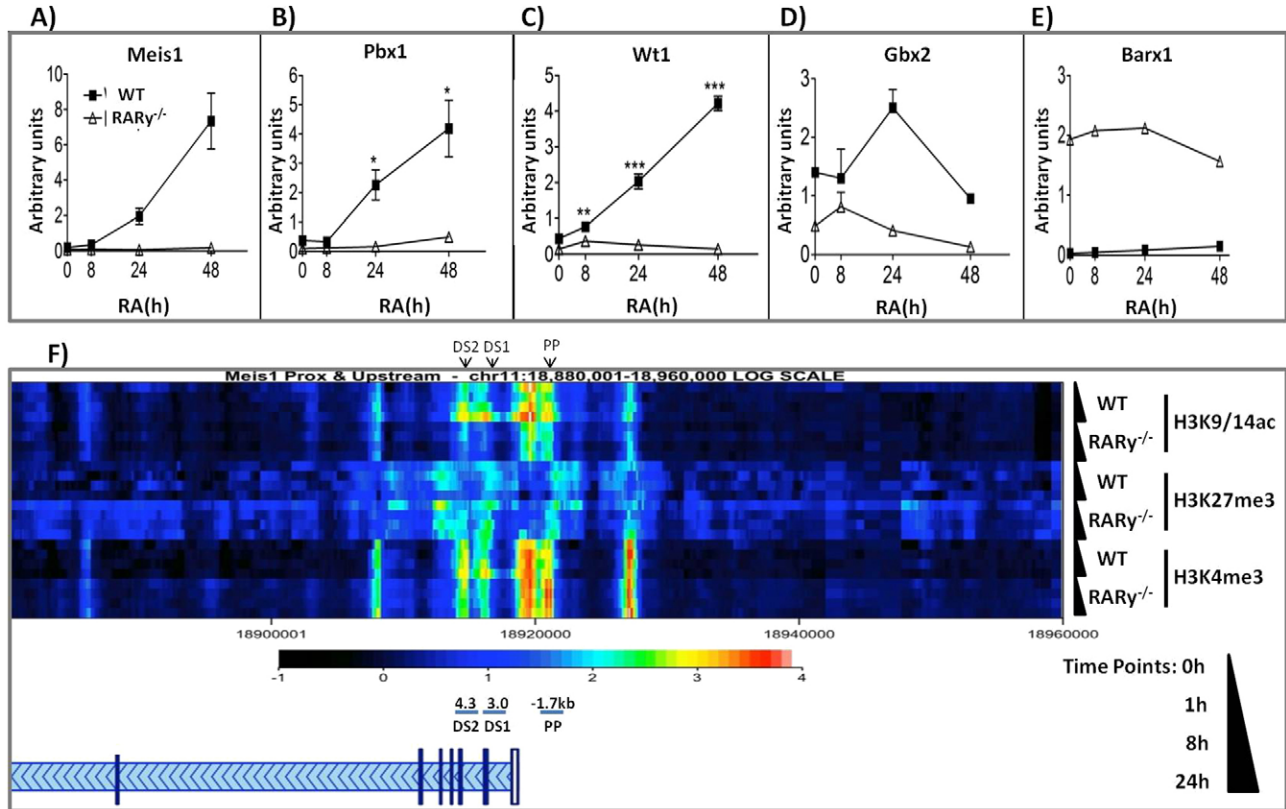

**Fig. 3. RA regulated induction of transcription factors.** (A–E) Transcript levels in WT and RAR $\gamma^{-/-}$  ES cells of Meis1, Pbx1, Wt1, Gbx2, and Barx1. Experiments were performed three times using independent RNA samples (filled squares, WT; open triangles, RAR $\gamma^{-/-}$ ); error bars indicate s.e.m. (F) ChIP-chip heat-map of the Meis1 proximal promoter region showing H3K9/14ac, H3K27me3, and H3K4me3 histone marks in WT and RAR $\gamma^{-/-}$  cells upon increasing times of exposure to RA (0, 1, 8, and 24 h, black triangle). The colors represent log<sub>2</sub>-transformed ChIP enrichment in ChIP-chip data sets (replicate means). DS1 and DS2 indicate downstream sites 1 and 2; PP indicates the proximal promoter region. Columns show genomic loci and rows show IP condition. Statistical significance:  $P < 0.05$ ,  $**P < 0.01$ ,  $***P < 0.005$ . The color scale of the log<sub>2</sub> enrichment is indicated below the ChIP-chip data panel. The Meis1 exon (broad) and intron (narrow) locations (blue tones) are indicated schematically at the bottom.

downstream of the transcription start site (TSS) in the Meis1 gene (Fig. 3F, arrows; Fig. 4A). H3K9/14ac epigenetic marks are generally associated with transcriptionally active genes (Jenuwein and Allis, 2001). In contrast, the H3K9/14ac levels at the promoter and downstream intragenic regions of the Meis1 gene were much lower in the RAR $\gamma^{-/-}$  cells compared to the WT cells (Fig. 3F; Fig. 4A), correlating with Meis1 transcript levels in WT versus RAR $\gamma^{-/-}$  cells (Fig. 3A). The H3K4me3 mark is elevated in a region surrounding the promoter of the Meis1 gene in both untreated and RA treated WT and RAR $\gamma^{-/-}$  cells (Fig. 3F; Fig. 4C).

Meis1 resides in a bivalent chromatin domain, e.g. it is associated with both with the repressive H3K27me3 mark deposited by PcG proteins (Boyer et al., 2006) and with the permissive H3K4me3 mark described above. By 24 h of RA treatment there is a reduction in the H3K27me3 mark (Fig. 3F), and in the levels of Suz12 protein (Fig. 4B) at the promoter and in the gene body of Meis1 in WT cells. However, in RAR $\gamma^{-/-}$  cells both the H3K27me3 mark and Suz12 levels remain high at 24 h of RA treatment (Fig. 3F; Fig. 4B). Thus, RA signaling via RAR $\gamma$  antagonizes the PcG mediated repression of the Meis1 gene, and the lack of RAR $\gamma$  prevents the removal of the H3K27me3 mark from the Meis1 gene (Fig. 3F).

Taken together, these data suggest that at the Meis1 gene RAR $\gamma$  (or its downstream targets) is required for RA induced changes in the

epigenetic configuration comprising the H3K9/14ac marks. However, RAR $\gamma$  is not needed for the deposition of the H3K4me3 mark at the Meis1 promoter and the H3K4me3 mark does not correlate with transcription of Meis1 in RA treated RAR $\gamma^{-/-}$  cells (Fig. 3F).

#### The Meis1 promoter proximal region appears devoid of functional retinoic acid response elements (RAREs)

The effects of RA are mediated through RAREs, and consequently the epigenomic structure exhibits dramatic changes in response to RA, generating hot-spots in the ChIP-chip maps. We evaluated the Meis1 proximal promoter region (defined as TSS  $\pm$  40 kb), and identified three sites exhibiting dramatic epigenetic changes in response to RA (Fig. 3F, arrows). Given the critical role of RAR $\gamma$  in the regulation of the Meis1 gene, we further characterized the levels of retinoic acid receptor  $\gamma$  (RAR $\gamma$ ) and retinoid receptor  $\alpha$  (RXR $\alpha$ ) at these three sites (Fig. 5A,B). RAR $\gamma$  levels were slightly elevated in WT versus RAR $\gamma^{-/-}$  cells at all evaluated regions, but showed no specific enrichment at any one particular region. The levels of RXR $\alpha$  at all of these regions were similar to those of IgG (Fig. 5A,B versus Fig. 5F). We detected binding of RXR $\alpha$  at the Cyp26a1 promoter, our positive control (supplementary material Fig. S1), consistent with our previous studies indicating that Cyp26a1 is a direct RA target gene (Kashyap et al., 2011). Consequently, the Meis1 proximal promoter region appears to be devoid of functional RAREs.

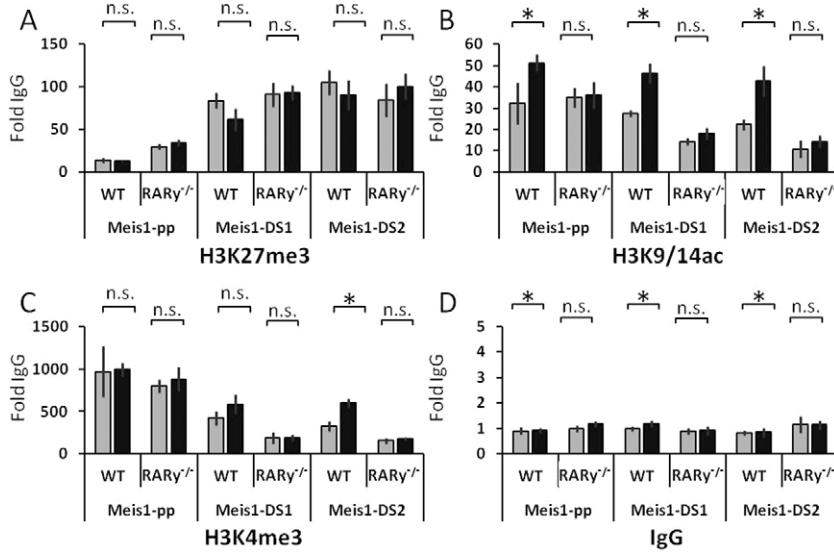

**Fig. 4. H3K9/14ac, Suz12, and H3K4me3 associate with specific Meis1 elements.** ChIP assays of Meis1  $P_{\text{refseq}}$  (pp) and Meis1 downstream elements (DS1 and DS2) in WT and  $RAR\gamma^{-/-}$  ES cells evaluating (A) H3K9/14ac; (B) Suz12; and (C) H3K4me3 association with each of the three Meis1 elements. (D) IgG was used as a negative control. Each experiment was repeated at least three times, starting with freshly plated cells, and evaluated by quantitative PCR. The data are plotted as fold enrichment relative to IgG background. Note that the y-axes are different in each panel. Values are means  $\pm$  s.e.m. of three independent experiments. Statistical significance: \* $P < 0.05$ ; n.s., not significant. Untreated, gray bars; treated with RA for 24 h, black bars.

### Pol II, p300, and histone acetylation are decreased in $RAR\gamma$ knockout cells compared to WT cells

In the WT cells we detected RA induced enrichment of Pol II, most pronounced at the promoter proximal region of Meis1. In contrast to the WT cells, we detected low levels of Pol II in both untreated and RA treated  $RAR\gamma^{-/-}$  cells, suggesting that RA fails to increase the levels of Pol II in the  $RAR\gamma^{-/-}$  cells (Fig. 5C).

We also assessed the association of the H3K27ac mark and the recruitment of the co-activator p300 (KAT3B) in WT and  $RAR\gamma^{-/-}$  ES cells by ChIP. The H3K27ac mark is associated with active enhancers and promoters and this epigenetic mark antagonizes the repressive H3K27me3 mark associated with PcG silencing (Creyghton et al., 2010; Pasini et al., 2010; Vernimmen et al., 2011). In addition, the transcriptional co-activator p300 possesses histone acetyltransferase activity and is recruited to

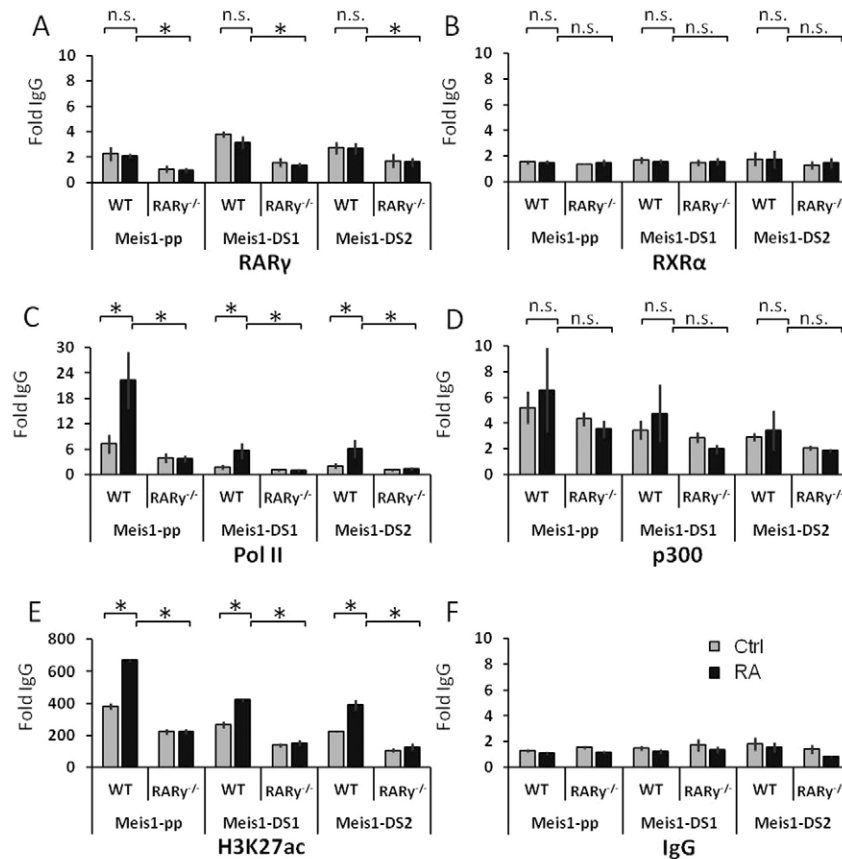

**Fig. 5.  $RAR\gamma$ ,  $RXR\alpha$ , H3K27ac, p300, and PolII-CTD association with specific Meis1 elements.** ChIP assays of Meis1  $P_{\text{refseq}}$  (pp) and Meis1 downstream elements (DS1 and DS2) in WT and  $RAR\gamma^{-/-}$  ES cells to evaluate the association of (A)  $RAR\gamma$ , (B)  $RXR\alpha$ , (C) H3K27ac, (D) p300, and (E) PolII-CTD with each of the three Meis1 elements. (F) IgG was used as a negative control. Each experiment was repeated at least three times, starting with freshly plated cells, and evaluated by quantitative PCR performed in triplicate. The data are plotted as fold enrichment over IgG background. Values are means  $\pm$  s.e.m. of three independent experiments. Statistical significance: \* $P < 0.05$ ; n.s., not significant. Untreated, gray bars; treated with RA for 24 h, black bars.



regulatory enhancer elements in the genome (Heintzman et al., 2009; Visel et al., 2009; Wang et al., 2005). Levels of the H3K27ac mark at the proximal promoter and at the DS1 and DS2 downstream sites of the *Meis1* gene increased upon RA treatment of WT, but not *RAR $\gamma$ <sup>-/-</sup>* cells (Fig. 5D). We observed low levels of enrichment of p300 at the proximal promoter and the two downstream regions in untreated WT cells. Levels of p300 at the *Meis1* gene did not increase significantly with RA treatment, but the levels of both H3K27ac and p300 association were consistently higher in WT compared to *RAR $\gamma$ <sup>-/-</sup>* cells (Fig. 5D,E).

### RAR $\gamma_2$ is necessary and sufficient for RA induced transcription of *Meis1*

Because no significant binding of RAR $\gamma$  (or RXR $\alpha$ ) was detected in the *Meis1* DS1 and DS2 regions identified by the ChIP-chip analysis we decided to further validate the requirement for RAR $\gamma$ . We employed shRNA to deplete RAR $\gamma$  functionally and specifically, thereby providing an independent validation of the RAR $\gamma$  dependent induction of *Meis1*. The RAR $\gamma$  shRNA knockdown reduced RAR $\gamma$  transcript levels to ~25% of the levels in WT cells, which decreased *Meis1* transcript levels to 21% and 45% of the shLuc control with 24 and 48 h of RA treatment, respectively (Fig. 6A). Additionally, we show that knockdown of RAR $\gamma$  by shRNA does not reduce RAR $\alpha$  and RAR $\beta$  transcript levels (supplementary material Fig. S2). These data confirm that RA induces transcription of *Meis1* through the actions of RAR $\gamma$  in ES cells.

We next determined if the RA responsiveness of *Meis1* can be restored by reintroducing RAR $\gamma_2$ , which is the predominantly expressed RAR $\gamma$  isoform. We generated two independent cell lines which ectopically express RAR $\gamma_2$  in the RAR $\gamma$  null background. We then assessed *Meis1* mRNA levels in each of the two RAR $\gamma_2$  restoration cell lines (Fig. 6B). We observed *Meis1* transcripts in both RAR $\gamma_2$  restoration cell lines relative to the RAR $\gamma$ <sup>-/-</sup> ES cell line (WT: 19- to 22-fold, clone 1: 10- to 12-fold, and clone 2: 19- to 33-fold, each relative to *Meis1* transcript levels in RAR $\gamma$ <sup>-/-</sup> cells,  $P < 0.005$  for either treatment condition). Expression of the ectopic RAR $\gamma_2$  cassette was confirmed by assessing RAR $\gamma_2$  transcript levels in the restoration cell lines. The restored RA responsiveness of *Meis1* upon ectopic RAR $\gamma_2$  expression demonstrates that RAR $\gamma_2$  is both necessary and sufficient for the RA-associated increase in *Meis1* transcripts.

### Discussion

We utilized microarray analysis to identify RAR $\gamma$  regulated genes in WT and RAR $\gamma$ <sup>-/-</sup> ES cells cultured in the presence versus the absence of RA. The microarray data analysis revealed the important role of RAR $\gamma$  in gene regulation in both the presence of the RA agonist (Fig. 1A; supplementary material Table S4A,B), and in the absence of the ligand, as we observed large numbers of genes that were differentially regulated even in untreated RAR $\gamma$ <sup>-/-</sup> versus WT ES cells (Fig. 1B; supplementary material Table S2A,B). Additionally, we show that transcript levels of many genes decrease upon 24 h of RA treatment in WT ES cells, thus implicating RA in gene repression (Fig. 1C; supplementary material Table S6B).

### The interaction of RAR $\gamma$ with transcription factors and polycomb repressive complexes

The antagonistic, functional cross-talk between RARs and polycomb group (PcG) protein regulated transcription in stem

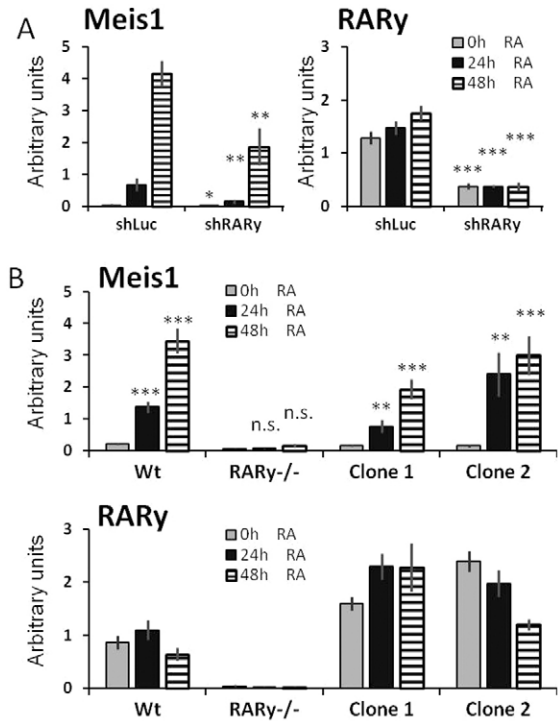

**Fig. 6. RAR $\gamma$  knockdown decreases *Meis1* transcript levels, and ectopic RAR $\gamma_2$  in RAR $\gamma$ <sup>-/-</sup> cells restores *Meis1* transcript levels.** (A) In WT ES cells, RAR $\gamma$  knockdown by stable shRNA decreased endogenous *Meis1* transcript levels to 21% and 45% upon 24 and 48 h of RA treatment, respectively, as assessed by real time RT-PCR. RAR $\gamma$  transcript levels were reduced to 25% by expression of a RAR $\gamma$ -specific shRNA (shRAR $\gamma$ ) relative to a control shRNA targeting luciferase (shLuc). Statistical significance: \* $P < 0.05$ , \*\* $P < 0.01$ , \*\*\* $P < 0.005$  relative to WT cells under similar conditions. (B) In RAR $\gamma$ <sup>-/-</sup> ES cells ectopic expression of RAR $\gamma_2$  restored RA responsive levels of *Meis1* transcripts. Results are shown from two independent clones (1 and 2). Statistical significance is indicated by \* $P < 0.05$ , \*\* $P < 0.01$ , \*\*\* $P < 0.005$  relative to untreated cells.

cells has raised many questions concerning the mechanistic details of the recruitment and displacement of the PcG proteins from retinoid regulated genes. It is worth noting that the PcG protein EZH2 has also been shown to associate directly with the repressor of estrogen receptor activity (REA), a co-repressor of ER, and EZH2 repressed estrogen-induced transcription from a reporter (Hwang et al., 2008). These findings call for the identification of co-regulators of RAR mediated transcription that may bind and target PcG proteins to RA target genes in stem cells. We showed that the polycomb protein Suz12 interacts with RAR $\gamma$  in the absence of RA in ES cells and that this interaction is abrogated upon RA addition; however this interaction may not be by direct binding and could be bridged through association with other transcriptional regulators, such as co-repressors (Amat and Gudas, 2011). Importantly, by using the RAR $\gamma$ <sup>-/-</sup> ES cells we have shown that the lack of RAR $\gamma$  does not interfere with the basal association of the PcG mediated H3K27me3 mark at the *Hoxa* and *Hoxb* clusters and other RA targets, such as *Cyp26a1* (Kashyap et al., 2011) and *Meis1* (Fig. 3F).

Given the differential chromatin signatures and transcript profiles across different cell lineages (Kashyap and Gudas, 2010), it is likely that RARs exhibit cross-talk with other transcription factors in a cell-type dependent manner. In fact, the cell-specific

functions of RARs may be executed in conjunction with transcription factors that play key roles in the biological functions of their respective lineages. The interplay of RARs with other transcription factors, such as Foxa1 (Hua et al., 2009), calls for interrogation and identification of additional transcription factors that may regulate the functions of RARs in ES cells. Some of the transcription factors that we have identified as being transcriptionally activated by RAR $\gamma$  (Figs 1, 3) in ES cells in response to RA are candidates for playing such roles.

### RAR $\gamma$ is required for RA-associated epigenetic changes at the *Lrat* gene

Our data show that RA increases *Lrat* transcript levels in WT, but not in RAR $\gamma^{-/-}$  cells (Fig. 2A). We show that RAR $\gamma$  is required for the removal of the H3K27me3 mark from the *Lrat* gene, and that failure to deplete the repressive H3K27me3 mark specifically at the *Lrat* proximal promoter region is associated with the lack of transcriptional activation by RA in the RAR $\gamma^{-/-}$  cells (Fig. 2F). RAR $\gamma$  is not required for the placement of the H3K4me3 mark and the presence of this mark is not sufficient for *Lrat* transcriptional activation in RAR $\gamma^{-/-}$  cells (Fig. 2F). We did not detect a DR2 or DR5 RARE within 2 kb 5' or 3' of the *Lrat* start site of transcription, suggesting that *Lrat* may possess an RARE at some distance from the coding region or that *Lrat* is a secondary RAR target gene. The absence of H3K9/14ac marks in the *Lrat* proximal promoter region suggests that RA induction of *Lrat* is regulated mainly by dissociation of the H3K27me3 repressive mark, a feature which is observed in WT, but not in RAR $\gamma^{-/-}$  cells (Fig. 2F).

### Meis1 transcriptional activation by RA involves loss of PcG mediated repression and RAR $\gamma$ mediated epigenetic activation

RA signaling in WT ES cells leads to increased association of the transcriptional activation marks H3K9/14ac at the *Meis1* gene, concomitant with increased levels of Pol II (Figs 3–5). These RA dependent epigenetic changes are attenuated or absent in the RAR $\gamma^{-/-}$  cells, in accord with the significantly lower *Meis1* transcript levels in RA treated RAR $\gamma^{-/-}$  cells (Figs 3–5). Importantly, we did not find any correlation between placement of the H3K4me3 mark and transcriptional activation of *Meis1* by RA. Like the H3K27me3 mark, the H3K4me3 mark is recruited independently of RAR $\gamma$ , thus generating a bivalent domain (Fig. 3F). In this environment in WT cells the activation of RAR $\gamma$  by RA induces local depletion of the H3K27me3 mark, thus shifting the balance between repressive and permissive H3K4me3 histone marks. In addition, the RA induced recruitment of co-activators favors histone acetylation, further potentiating transcriptional induction. We confirmed the requirement for RAR $\gamma$  in the induction of *Meis1* through shRAR $\gamma$  depletion of RAR $\gamma$  (Fig. 6A), but we did not detect binding of RAR $\gamma$  or RXR $\alpha$  in the DS1 and DS2 regions of the *Meis1* proximal promoter region (Fig. 3F; Fig. 5). This indicates that *Meis1* may be an indirect, secondary target of RAR $\gamma$  in ES cells. Alternatively, RAR/RXR binding could occur at an enhancer region distant (+40 kb) from the *Meis1* proximal promoter region. The presence of a conserved Pbx1 binding site in the *Meis1* proximal promoter region (Magnani et al., 2011) suggests that RAR $\gamma$  may induce *Meis1* through or possibly in cooperation with Pbx1.

### Conclusions

Our analysis shows that many genes exhibit reduced expression upon RA treatment of WT ES cells; in fact, while 91 genes showed upregulation by RA, 40 genes, including *Otx2* and *Zfp42*, exhibited downregulation by RA at 24 h. This points to non-consensus RA signaling in addition to ligand-induced transcription. Several genes, including DNMT3L, *Suv39h1*, and *Tex13*, were differentially expressed between WT and RAR $\gamma^{-/-}$  ES cells independent of RA treatment. Consequently, RAR $\gamma$  may have ligand-independent functions similar to those recently reported for RAR $\alpha$  (Laursen et al., 2012). Our research data also lead to novel conclusions about epigenetic modifications of RA-responsive genes in ES cells. First, RAR $\gamma$  is not required for placement of the H3K4me3 epigenetic mark in ES cells and the presence of this mark is not sufficient for transcriptional activation of the RA responsive genes *Lrat* and *Meis1*. Additionally, the lack of RAR $\gamma$  increases the association of the H3K27me3 mark with the proximal promoter of *Meis1*, but not with the downstream elements DS1 and DS2. In conclusion, these data provide new insights into the types of RA induced epigenetic changes in embryonic stem cells.

### Materials and Methods

#### Derivation and culture of the ES cell lines

The cell lines were derived and cultured as described previously (Kashyap et al., 2011). All-trans retinoic acid (RA; Cat. no. 2625, Sigma Chemical Co., MO). RA (1  $\mu$ M) was added to the cells 24 h after cell-plating and ethanol (0.1%) was used as a vehicle control.

#### Generation of RAR $\gamma$ knockdown cell lines

Generation of viral particles and transduction of ES cells was previously described (Benoit et al., 2009). In brief, knockdown vectors pLKO shRAR $\gamma$  (hair-pin sequence 5'-CCCAGAGGAAGCCTCTATTA-3') or pLKO shLuc (control), together with packaging vectors pCMV $\Delta$ 8.9 and pVSV-G (Cat. no. 631530, Clontech, CA), were transfected into HEK293T cells using Lipofectamine 2000 (Cat. no. 11668, Invitrogen, CA). After overnight recovery the medium was replaced with fresh medium and the cells were allowed to produce virus for an additional 48 h before the supernatant was harvested, filtered through 0.45  $\mu$ m filters, and supplemented with polybrene. WT ES cells were transduced with viral supernatant in a 1:1 ratio with 2 $\times$  growth medium. About 16 h later, the medium was replaced with medium supplemented with puromycin (Cat. no. P7255, Sigma Chemical Co., MO) at a final concentration of 0.5  $\mu$ g/ml for 10 days of propagation in the selection medium. After this, puromycin was not included in the medium.

#### Generation of stable clones

The pRosa26-SV40 mRAR $\gamma_2$  expression vector was stably introduced into RAR $\gamma^{-/-}$  ES cells. In brief, the pRosa26 expression vector, which contains a Hygromycin expression cassette was transfected into RAR $\gamma^{-/-}$  ES cells using LTX Plus reagent (Cat. no. 15338, Invitrogen, CA) according to manufacturer's instructions. Selection of stable clones was performed using hygromycin (Cat. no. 10687, Invitrogen, CA) at a final concentration of 100  $\mu$ g/ml for 10 days. Colonies were picked and screened by PCR using the mRAR $\gamma$ E7(+)/mRAR $\gamma$ E8(-) primer pair. Successful gDNA purification was evident by a 334 bp PCR product, whereas integration of the transgene was evident by an additional PCR product of 241 bp. Transgene expression in positive clones was verified by the presence of a 162 bp PCR product using the  $\beta$ -globin5'/ $\beta$ -globin3' primer pair, which spans the  $\beta$ -globin intron of the pRosa26-SV40 vector. In addition, the generation of RAR $\gamma$  protein was validated by western blotting (data not shown).

#### RNA isolation and reverse transcription

Total RNA was extracted using Trizol reagent (Cat. no. 15596, Invitrogen, CA). The RNA was quantitated by optical density at 260 nm. The RNA (1  $\mu$ g) was reverse transcribed to cDNA using the Quanta reverse transcription mix (Cat. no. 95048, Quanta Biosciences, MD). The cDNA obtained was diluted tenfold and 2  $\mu$ l of diluted cDNA was utilized for quantitative PCR reactions.

#### Real time PCR and primers

Real time PCR was carried out in a total volume of 20  $\mu$ l using the Sybr Green mix (Cat. no. 84091, Quanta Biosciences, MD) according to Kashyap et al. (Kashyap et al., 2011). The primers were designed using the UCSC genome browser (<http://genome.ucsc.edu/cgi-bin/hgPc>) and all real-time PCR primers were designed



around the introns. The primer sequences can be found in supplementary material Table S1.

#### Chromatin immunoprecipitation

Cells were treated with RA for 24 h, cross-linked (1% formaldehyde, 10 min), quenched (200 mM glycine, 5 min), washed with ice cold phosphate-buffered saline (PBS), and harvested by scraping. ChIP was performed according to Gillespie and Gudas (Gillespie and Gudas, 2007a; Gillespie and Gudas, 2007b). At least three biological replicate ChIP experiments were performed.

#### Antibodies and chemicals

Anti-H3K27ac (07-360), anti-H3K4me3 (07-473) and anti-H3K9/14ac (06-599) antibodies were purchased from Millipore (Billerica, MA). Anti-RXR $\alpha$  (D-20, sc-553), anti-p300 (N-15, sc-584), and anti-IgG (sc-2030) antibodies were purchased from Santa Cruz Biotechnology (Santa Cruz, CA). Anti-phospho-Ser-5 carboxyl-terminal domain (CTD) of RNA polymerase II (pCTDser5) was purchased from Covance Research Products (Richmond, CA). Anti-RAR $\gamma$  (ab12012) and Anti-H3K27me3 (ab6002) were purchased from Abcam Inc. (Cambridge, MA).

#### Microarray expression profiling and analysis

Cells were treated with RA for various times (0, 8 and 24 h) prior to harvesting. Total RNA was isolated using Trizol. RNA quality was assessed using the RNA 6000 NanoAssay and a Bioanalyzer 2100 (Agilent). Samples with a 28S/18S ribosomal peak ratio of 1.8–2.0 were considered suitable for labeling. 200 ng of total RNA from each sample was labeled using the Illumina Total Prep RNA Amplification kit (Ambion), according to the manufacturer's instructions. Labeled and fragmented cRNAs (3  $\mu$ g) were then hybridized to the mouse-ref8 array (Illumina), which incorporates 22,000 transcripts of known mouse genes. The raw data obtained from the Illumina microarray platform were imported into Genespring 11 (Agilent) and were normalized using the quantile normalization procedure. Following the normalization, the data were filtered for expression values. The data across replicates were averaged and subsequently, the list of genes that showed statistically significant fold changes ( $P < 0.05$ ) was obtained. The generation of the ChIP-chip data has been previously described (Kashyap et al., 2011). We obtained bioinformatics advice on data analyses from Dr Piali Mukherjee at the Epigenomics Core at Weill Cornell Medical College. Gene expression profiles were deposited at GEO with the accession code GSE43221 (<http://www.ncbi.nlm.nih.gov/geo/query/acc.cgi?acc=GSE43221>).

#### Acknowledgements

We thank members of the Gudas laboratory for helpful discussions about this research. We thank Dr Pierre Chambon for the RAR $\gamma$  knockout mice. We thank Tamara Weissman for editorial assistance in the preparation of this manuscript.

#### Author contributions

V.K., K.B.L., F.B., A.J.V., and J.M.S. performed experiments. V.K., K.B.L., J.M.S., and L.J.G. wrote the manuscript. V.K., K.B.L., A.J.V., J.M.S., and L.J.G. analyzed and interpreted the data.

#### Funding

This research was supported by National Institutes of Health [grant number NIH R01 CA043796 to L.J.G.]; and Weill Cornell funds [to L.J.G.]. Deposited in PMC for release after 12 months.

Supplementary material available online at

<http://jcs.biologists.org/lookup/suppl/doi:10.1242/jcs.119701/-/DC1>

#### References

Amat, R. and Gudas, L. J. (2011). RAR $\gamma$  is required for correct deposition and removal of Suz12 and H2A.Z in embryonic stem cells. *J. Cell. Physiol.* **226**, 293-298.

Amengual, J., Golczak, M., Palczewski, K. and von Lintig, J. (2012). Lecithin:retinol acyltransferase is critical for cellular uptake of vitamin A from serum retinol-binding protein. *J. Biol. Chem.* **287**, 24216-24227.

Azcoitia, V., Aracil, M., Martínez-A, C. and Torres, M. (2005). The homeodomain protein Meis1 is essential for definitive hematopoiesis and vascular patterning in the mouse embryo. *Dev. Biol.* **280**, 307-320.

Batten, M. L., Imanishi, Y., Maeda, T., Tu, D. C., Moise, A. R., Bronson, D., Possin, D., Van Gelder, R. N., Baehr, W. and Palczewski, K. (2004). Lecithin-retinol acyltransferase is essential for accumulation of all-trans-retinyl esters in the eye and in the liver. *J. Biol. Chem.* **279**, 10422-10432.

Bayha, E., Jørgensen, M. C., Serup, P. and Grapin-Botton, A. (2009). Retinoic acid signaling organizes endodermal organ specification along the entire antero-posterior axis. *PLoS ONE* **4**, e5845.

Benoit, Y. D., Lussier, C., Ducharme, P. A., Sivret, S., Schnapp, L. M., Basora, N. and Beaulieu, J. F. (2009). Integrin  $\alpha$ 8beta1 regulates adhesion, migration and proliferation of human intestinal crypt cells via a predominant RhoA/ROCK-dependent mechanism. *Biol. Cell* **101**, 695-708.

Berry, D. C., Jin, H., Majumdar, A. and Noy, N. (2011). Signaling by vitamin A and retinol-binding protein regulates gene expression to inhibit insulin responses. *Proc. Natl. Acad. Sci. USA* **108**, 4340-4345.

Boyer, L. A., Plath, K., Zeitlinger, J., Brambrink, T., Medeiros, L. A., Lee, T. I., Levine, S. S., Wernig, M., Tajonar, A., Ray, M. K. et al. (2006). Polycomb complexes repress developmental regulators in murine embryonic stem cells. *Nature* **441**, 349-353.

Boylan, J. F., Lohnes, D., Taneja, R., Chambon, P. and Gudas, L. J. (1993). Loss of retinoic acid receptor gamma function in F9 cells by gene disruption results in aberrant Hoxa-1 expression and differentiation upon retinoic acid treatment. *Proc. Natl. Acad. Sci. USA* **90**, 9601-9605.

Boylan, J. F., Lufkin, T., Achkar, C. C., Taneja, R., Chambon, P. and Gudas, L. J. (1995). Targeted disruption of retinoic acid receptor alpha (RAR alpha) and RAR gamma results in receptor-specific alterations in retinoic acid-mediated differentiation and retinoic acid metabolism. *Mol. Cell. Biol.* **15**, 843-851.

Chang, C. P., Brocchieri, L., Shen, W. F., Largman, C. and Cleary, M. L. (1996). Pbx modulation of Hox homeodomain amino-terminal arms establishes different DNA-binding specificities across the Hox locus. *Mol. Cell. Biol.* **16**, 1734-1745.

Chen, C. F., Goyette, P. and Lohnes, D. (2004). RARgamma acts as a tumor suppressor in mouse keratinocytes. *Oncogene* **23**, 5350-5359.

Clagett-Dame, M. and Knutson, D. (2011). Vitamin A in reproduction and development. *Nutrients* **3**, 385-428.

Creyghton, M. P., Cheng, A. W., Welstead, G. G., Kooistra, T., Carey, B. W., Steine, E. J., Hanna, J., Lodato, M. A., Frampton, G. M., Sharp, P. A. et al. (2010). Histone H3K27ac separates active from poised enhancers and predicts developmental state. *Proc. Natl. Acad. Sci. USA* **107**, 21931-21936.

Eklund, E. A. (2007). The role of HOX genes in malignant myeloid disease. *Curr. Opin. Hematol.* **14**, 85-89.

Featherstone, M. (2003). HOX proteins and their co-factors in transcriptional regulation. In *Advances in Developmental Biology and Biochemistry*, Vol. 13, pp. 1-42.

Gavalas, A., Ruhrberg, C., Livet, J., Henderson, C. E. and Krumlauf, R. (2003). Neuronal defects in the hindbrain of Hoxa1, Hoxb1 and Hoxb2 mutants reflect regulatory interactions among these Hox genes. *Development* **130**, 5663-5679.

Gillespie, R. F. and Gudas, L. J. (2007a). Retinoic acid receptor isotype specificity in F9 teratocarcinoma stem cells results from the differential recruitment of coregulators to retinoic response elements. *J. Biol. Chem.* **282**, 33421-33434.

Gillespie, R. F. and Gudas, L. J. (2007b). Retinoid regulated association of transcriptional co-regulators and the polycomb group protein SUZ12 with the retinoic acid response elements of Hoxa1, RARbeta(2), and Cyp26A1 in F9 embryonal carcinoma cells. *J. Mol. Biol.* **372**, 298-316.

Golzio, S., Martinovic-Bouriel, J., Thomas, S., Mougou-Zrelli, S., Grattagliano-Bessieres, B., Bonniere, M., Delahaye, S., Munnich, A., Encha-Razavi, F., Lyonnet, S. et al. (2007). Matthew-Wood syndrome is caused by truncating mutations in the retinol-binding protein receptor gene STRA6. *Am. J. Hum. Genet.* **80**, 1179-1187.

Goyette, P., Feng Chen, C., Wang, W., Seguin, F. and Lohnes, D. (2000). Characterization of retinoic acid receptor-deficient keratinocytes. *J. Biol. Chem.* **275**, 16497-16505.

Gudas, L. J. and Wagner, J. A. (2011). Retinoids regulate stem cell differentiation. *J. Cell. Physiol.* **226**, 322-330.

Guo, X. and Gudas, L. J. (1998). Metabolism of all-trans-retinol in normal human cell strains and squamous cell carcinoma (SCC) lines from the oral cavity and skin: reduced esterification of retinol in SCC lines. *Cancer Res.* **58**, 166-176.

Heintzman, N. D., Hon, G. C., Hawkins, R. D., Kheradpour, P., Stark, A., Harp, L. F., Ye, Z., Lee, L. K., Stuart, R. K., Ching, C. W. et al. (2009). Histone modifications at human enhancers reflect global cell-type-specific gene expression. *Nature* **459**, 108-112.

Hisa, T., Spence, S. E., Rachel, R. A., Fujita, M., Nakamura, T., Ward, J. M., Devor-Henneman, D. E., Saiki, Y., Kutsuna, H., Tessarollo, L. et al. (2004). Hematopoietic, angiogenic and eye defects in Meis1 mutant animals. *EMBO J.* **23**, 450-459.

Hua, S., Kittler, R. and White, K. P. (2009). Genomic antagonism between retinoic acid and estrogen signaling in breast cancer. *Cell* **137**, 1259-1271.

Hwang, C., Giri, V. N., Wilkinson, J. C., Wright, C. W., Wilkinson, A. S., Cooney, K. A. and Duckett, C. S. (2008). EZH2 regulates the transcription of estrogen-responsive genes through association with REA, an estrogen receptor corepressor. *Breast Cancer Res. Treat.* **107**, 235-242.

Jenuwein, T. and Allis, C. D. (2001). Translating the histone code. *Science* **293**, 1074-1080.

Kashyap, V. and Gudas, L. J. (2010). Epigenetic regulatory mechanisms distinguish retinoic acid-mediated transcriptional responses in stem cells and fibroblasts. *J. Biol. Chem.* **285**, 14534-14548.

Kashyap, V., Gudas, L. J., Brenet, F., Funk, P., Viale, A. and Scandura, J. M. (2011). Epigenomic reorganization of the clustered Hox genes in embryonic stem cells induced by retinoic acid. *J. Biol. Chem.* **286**, 3250-3260.

Kawagoe, H., Humphries, R. K., Blair, A., Sutherland, H. J. and Hogge, D. E. (1999). Expression of HOX genes, HOX cofactors, and MLL in phenotypically and functionally defined subpopulations of leukemic and normal human hematopoietic cells. *Leukemia* **13**, 687-698.

- Kawaguchi, R., Yu, J., Honda, J., Hu, J., Whitelegge, J., Ping, P., Wiita, P., Bok, D. and Sun, H. (2007). A membrane receptor for retinol binding protein mediates cellular uptake of vitamin A. *Science* **315**, 820-825.
- Kreidberg, J. A., Sariola, H., Loring, J. M., Maeda, M., Pelletier, J., Housman, D. and Jaenisch, R. (1993). WT-1 is required for early kidney development. *Cell* **74**, 679-691.
- Langton, S. and Gudas, L. J. (2008). CYP26A1 knockout embryonic stem cells exhibit reduced differentiation and growth arrest in response to retinoic acid. *Dev. Biol.* **315**, 331-354.
- Laursen, K. B., Wong, P. M. and Gudas, L. J. (2012). Epigenetic regulation by RAR $\alpha$  maintains ligand-independent transcriptional activity. *Nucleic Acids Res.* **40**, 102-115.
- Lin, Z., Cantos, R., Patente, M. and Wu, D. K. (2005). Gbx2 is required for the morphogenesis of the mouse inner ear: a downstream candidate of hindbrain signaling. *Development* **132**, 2309-2318.
- Liu, L. and Gudas, L. J. (2005). Disruption of the lecithin:retinol acyltransferase gene makes mice more susceptible to vitamin A deficiency. *J. Biol. Chem.* **280**, 40226-40234.
- Lohnes, D., Kastner, P., Dierich, A., Mark, M., LeMeur, M. and Chambon, P. (1993). Function of retinoic acid receptor gamma in the mouse. *Cell* **73**, 643-658.
- Magnani, L., Ballantyne, E. B., Zhang, X. and Lupien, M. (2011). PBX1 genomic pioneer function drives ER $\alpha$  signaling underlying progression in breast cancer. *PLoS Genet.* **7**, e1002368.
- Makarenkova, H. P. and Meech, R. (2012). Barx homeobox family in muscle development and regeneration. *Int. Rev. Cell Mol. Biol.* **297**, 117-173.
- Mark, M., Ghyselinck, N. B. and Chambon, P. (2009). Function of retinoic acid receptors during embryonic development. *Nucl. Recept. Signal.* **7**, e002.
- McGowan, S., Jackson, S. K., Jenkins-Moore, M., Dai, H. H., Chambon, P. and Snyder, J. M. (2000). Mice bearing deletions of retinoic acid receptors demonstrate reduced lung elastin and alveolar numbers. *Am. J. Respir. Cell Mol. Biol.* **23**, 162-167.
- Means, A. L. and Gudas, L. J. (1995). The roles of retinoids in vertebrate development. *Annu. Rev. Biochem.* **64**, 201-233.
- Meister, B., Fink, F. M., Hittmair, A., Marth, C. and Widschwendter, M. (1998). Antiproliferative activity and apoptosis induced by retinoic acid receptor-gamma selectively binding retinoids in neuroblastoma. *Anticancer Res.* **18**, 1777-1786.
- Moens, C. B. and Selleri, L. (2006). Hox cofactors in vertebrate development. *Dev. Biol.* **291**, 193-206.
- Noy, N. (2001). Retinoid-binding proteins: mediators of retinoid action. *Biochem. J.* **348**, 481-495.
- O'Byrne, S. M., Wongsiriroj, N., Libien, J., Vogel, S., Goldberg, I. J., Baehr, W., Palczewski, K. and Blauer, W. S. (2005). Retinoid absorption and storage is impaired in mice lacking lecithin:retinol acyltransferase (LRAT). *J. Biol. Chem.* **280**, 35647-35657.
- Pasini, D., Malatesta, M., Jung, H. R., Walfridsson, J., Willer, A., Olsson, L., Skotte, J., Wutz, A., Porse, B., Jensen, O. N. et al. (2010). Characterization of an antagonistic switch between histone H3 lysine 27 methylation and acetylation in the transcriptional regulation of Polycomb group target genes. *Nucleic Acids Res.* **38**, 4958-4969.
- Pasutto, F., Sticht, H., Hammersen, G., Gillessen-Kaesbach, G., Fitzpatrick, D. R., Nürnberg, G., Brasch, F., Schirmer-Zimmermann, H., Tolmie, J. L., Chitayat, D. et al. (2007). Mutations in STRA6 cause a broad spectrum of malformations including anophthalmia, congenital heart defects, diaphragmatic hernia, alveolar capillary dysplasia, lung hypoplasia, and mental retardation. *Am. J. Hum. Genet.* **80**, 550-560.
- Pelletier, J., Bruening, W., Li, F. P., Haber, D. A., Glaser, T. and Housman, D. E. (1991a). WT1 mutations contribute to abnormal genital system development and hereditary Wilms' tumour. *Nature* **353**, 431-434.
- Pelletier, J., Schalling, M., Buckler, A. J., Rogers, A., Haber, D. A. and Housman, D. (1991b). Expression of the Wilms' tumor gene WT1 in the murine urogenital system. *Genes Dev.* **5**, 1345-1356.
- Purton, L. E. (2007). Roles of retinoids and retinoic acid receptors in the regulation of hematopoietic stem cell self-renewal and differentiation. *PPAR Res.* **2007**, 87934.
- Purton, L. E., Dworkin, S., Olsen, G. H., Walkley, C. R., Fabb, S. A., Collins, S. J. and Chambon, P. (2006). RARgamma is critical for maintaining a balance between hematopoietic stem cell self-renewal and differentiation. *J. Exp. Med.* **203**, 1283-1293.
- Samarut, E. and Rochette-Egly, C. (2012). Nuclear retinoic acid receptors: conductors of the retinoic acid symphony during development. *Mol. Cell. Endocrinol.* **348**, 348-360.
- Shanmugam, K., Green, N. C., Rambaldi, I., Saragovi, H. U. and Featherstone, M. S. (1999). PBX and MEIS as non-DNA-binding partners in trimeric complexes with HOX proteins. *Mol. Cell. Biol.* **19**, 7577-7588.
- Shen, W. F., Chang, C. P., Rozenfeld, S., Sauvageau, G., Humphries, R. K., Lu, M., Lawrence, H. J., Cleary, M. L. and Largman, C. (1996). Hox homeodomain proteins exhibit selective complex stabilities with Pbx and DNA. *Nucleic Acids Res.* **24**, 898-906.
- Shen, W. F., Montgomery, J. C., Rozenfeld, S., Moskow, J. J., Lawrence, H. J., Buchberg, A. M. and Largman, C. (1997). AbdB-like Hox proteins stabilize DNA binding by the Meis1 homeodomain proteins. *Mol. Cell. Biol.* **17**, 6448-6458.
- Sims, R. J., 3rd and Reinberg, D. (2006). Histone H3 Lys 4 methylation: caught in a bind? *Genes Dev.* **20**, 2779-2786.
- Smith, A. G. (2001). Embryo-derived stem cells: of mice and men. *Annu. Rev. Cell Dev. Biol.* **17**, 435-462.
- Soprano, D. R., Teets, B. W. and Soprano, K. J. (2007). Role of retinoic acid in the differentiation of embryonal carcinoma and embryonic stem cells. *Vitam. Horm.* **75**, 69-95.
- Spanjaard, R. A., Ikeda, M., Lee, P. J., Charpentier, B., Chin, W. W. and Eberlein, T. J. (1997). Specific activation of retinoic acid receptors (RARs) and retinoid X receptors reveals a unique role for RARgamma in induction of differentiation and apoptosis of S91 melanoma cells. *J. Biol. Chem.* **272**, 18990-18999.
- Su, D. and Gudas, L. J. (2008a). Gene expression profiling elucidates a specific role for RARgamma in the retinoic acid-induced differentiation of F9 teratocarcinoma stem cells. *Biochem. Pharmacol.* **75**, 1129-1160.
- Su, D. and Gudas, L. J. (2008b). Retinoic acid receptor gamma activates receptor tyrosine kinase Tiel gene transcription through transcription factor GATA4 in F9 stem cells. *Exp. Hematol.* **36**, 624-641.
- Vernimmen, D., Lynch, M. D., De Gobbi, M., Garrick, D., Sharpe, J. A., Sloane-Stanley, J. A., Smith, A. J. and Higgs, D. R. (2011). Polycomb eviction as a new distant enhancer function. *Genes Dev.* **25**, 1583-1588.
- Visel, A., Blow, M. J., Li, Z., Zhang, T., Akiyama, J. A., Holt, A., Plajzer-Frick, I., Shoukry, M., Wright, C., Chen, F. et al. (2009). CHIP-seq accurately predicts tissue-specific activity of enhancers. *Nature* **457**, 854-858.
- Wang, Q., Carroll, J. S. and Brown, M. (2005). Spatial and temporal recruitment of androgen receptor and its coactivators involves chromosomal looping and polymerase tracking. *Mol. Cell* **19**, 631-642.
- Wang, G. G., Pasillas, M. P. and Kamps, M. P. (2006). Persistent transactivation by meis1 replaces hox function in myeloid leukemogenesis models: evidence for co-occupancy of meis1-pbx and hox-pbx complexes on promoters of leukemia-associated genes. *Mol. Cell. Biol.* **26**, 3902-3916.
- Wassarman, K. M., Lewandoski, M., Campbell, K., Joyner, A. L., Rubenstein, J. L., Martinez, S. and Martin, G. R. (1997). Specification of the anterior hindbrain and establishment of a normal mid/hindbrain organizer is dependent on Gbx2 gene function. *Development* **124**, 2923-2934.
- Wendling, O., Ghyselinck, N. B., Chambon, P. and Mark, M. (2001). Roles of retinoic acid receptors in early embryonic morphogenesis and hindbrain patterning. *Development* **128**, 2031-2038.
- White, J. A., Beckett-Jones, B., Guo, Y. D., Dilworth, F. J., Bonasoro, J., Jones, G. and Petkovich, M. (1997). cDNA cloning of human retinoic acid-metabolizing enzyme (hP450RAL) identifies a novel family of cytochromes P450. *J. Biol. Chem.* **272**, 18538-18541.
- Williams, J. A., Kondo, N., Okabe, T., Takeshita, N., Pilchak, D. M., Koyama, E., Ochiai, T., Jensen, D., Chu, M. L., Kane, M. A. et al. (2009). Retinoic acid receptors are required for skeletal growth, matrix homeostasis and growth plate function in postnatal mouse. *Dev. Biol.* **328**, 315-327.
- Wong, P., Iwasaki, M., Somervaille, T. C., So, C. W. and Cleary, M. L. (2007). Meis1 is an essential and rate-limiting regulator of MLL leukemia stem cell potential. *Genes Dev.* **21**, 2762-2774.
- Wu, M., Zhang, Y., Wu, N. H. and Shen, Y. F. (2009). Histone marks and chromatin remodelers on the regulation of neurogenin1 gene in RA induced neuronal differentiation of P19 cells. *J. Cell. Biochem.* **107**, 264-271.
- Zolfaghari, R. and Ross, A. C. (2000). Lecithin:retinol acyltransferase from mouse and rat liver. CDNA cloning and liver-specific regulation by dietary vitamin a and retinoic acid. *J. Lipid Res.* **41**, 2024-2034.
